# Supplementary material for: Probiotic Bifidobacterium breve MCC1274 Mitigates Alzheimer’s Disease-Related Pathologies in Wild-Type Mice
Source: MDPI journal article supplement (doi:10.3390/nu14122543), 2022-06-19
Supplement: s1 [file s1]

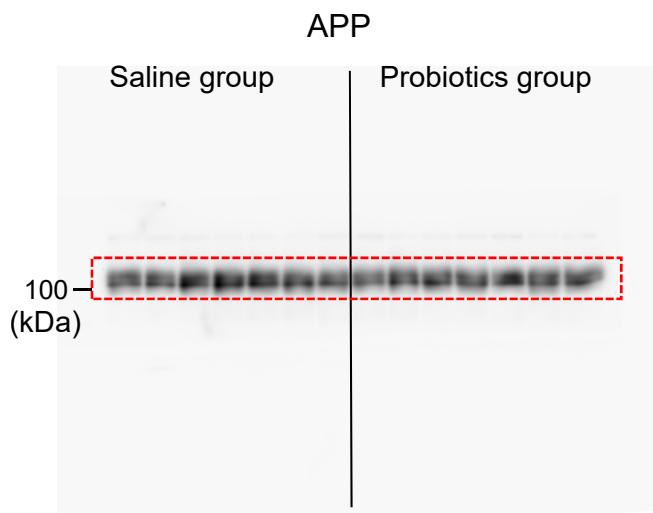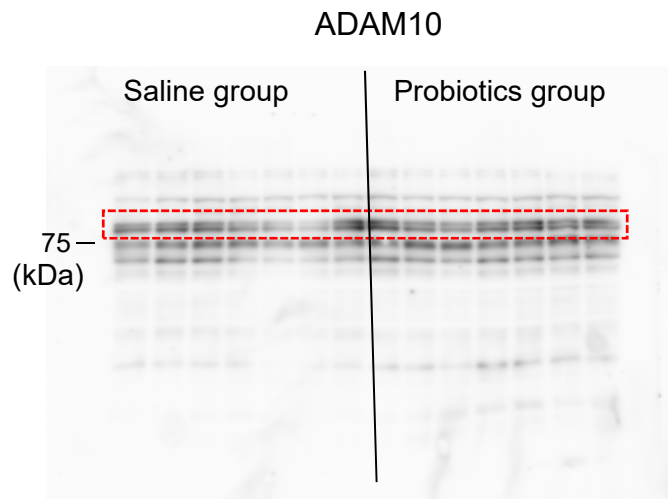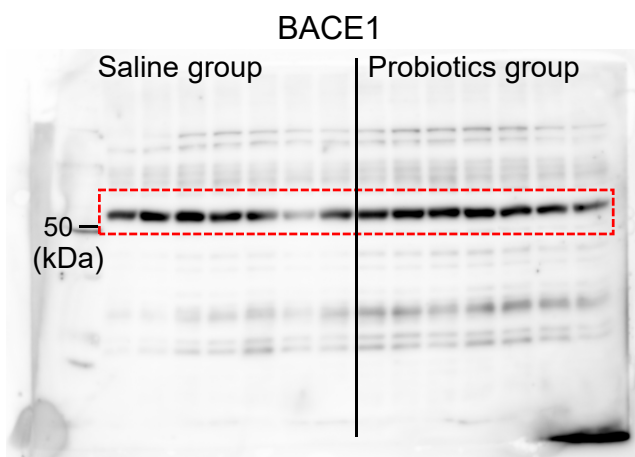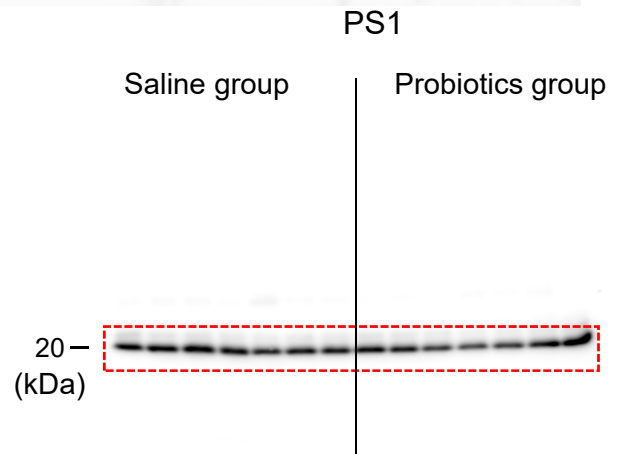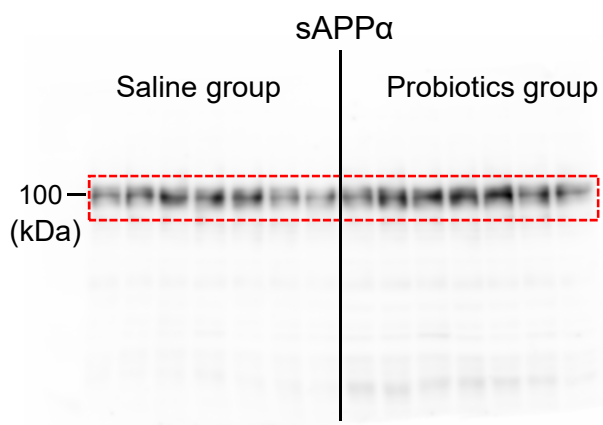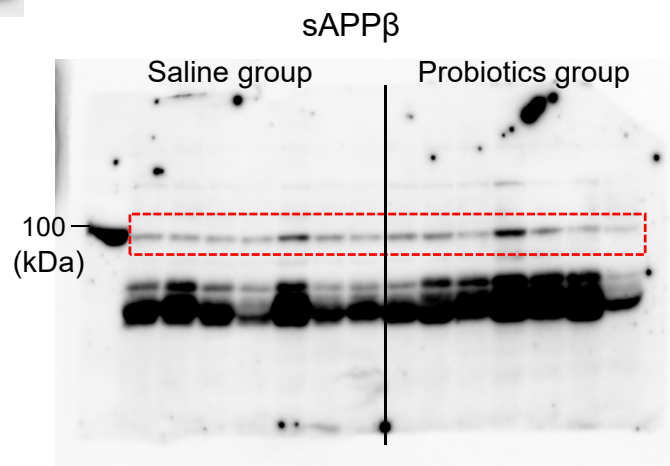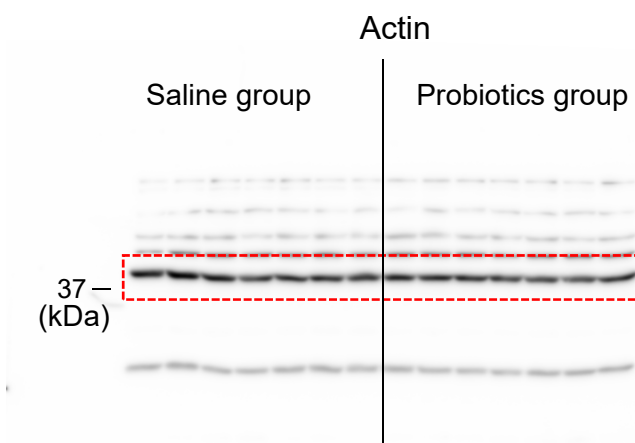

 = main figure

Figure 3 A

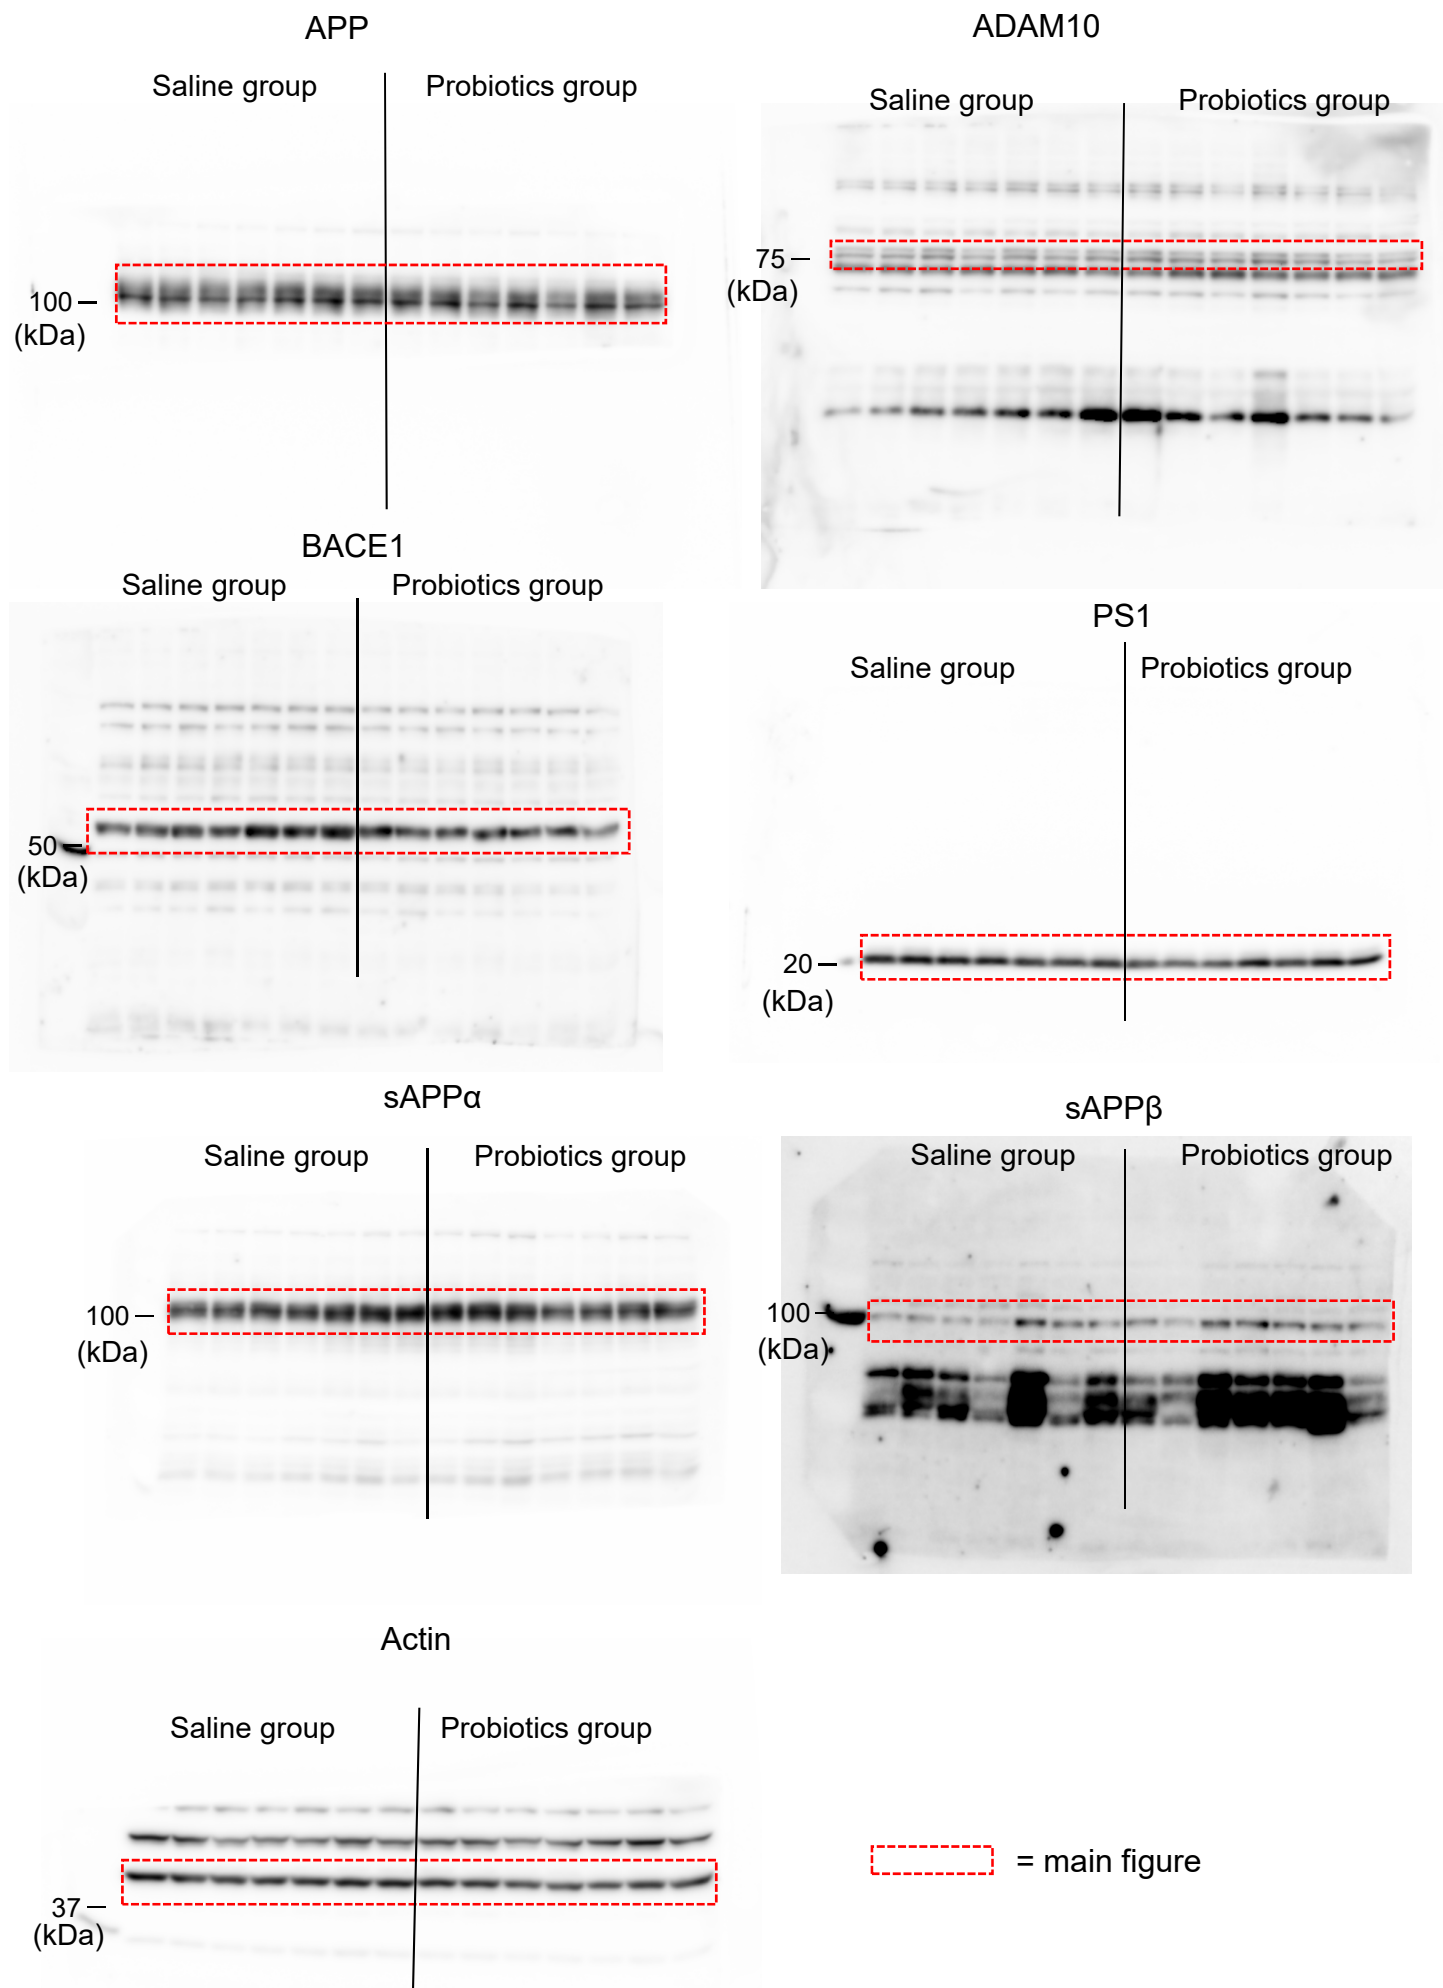

Figure 3 B

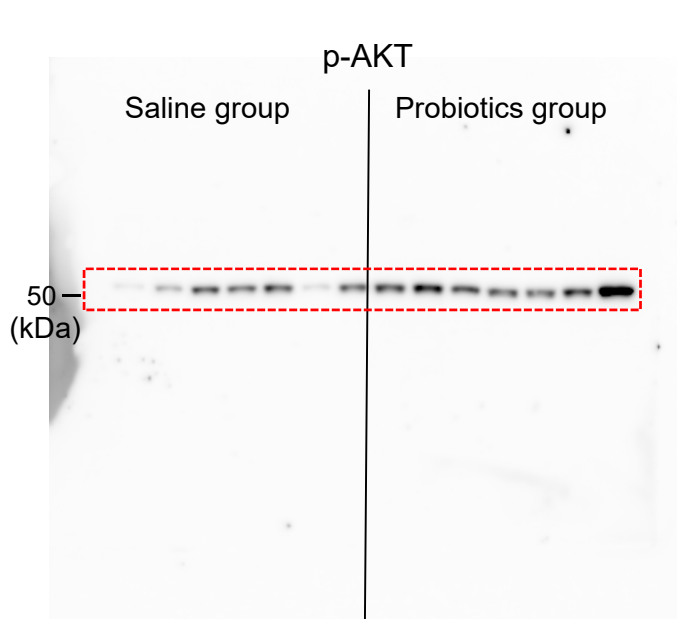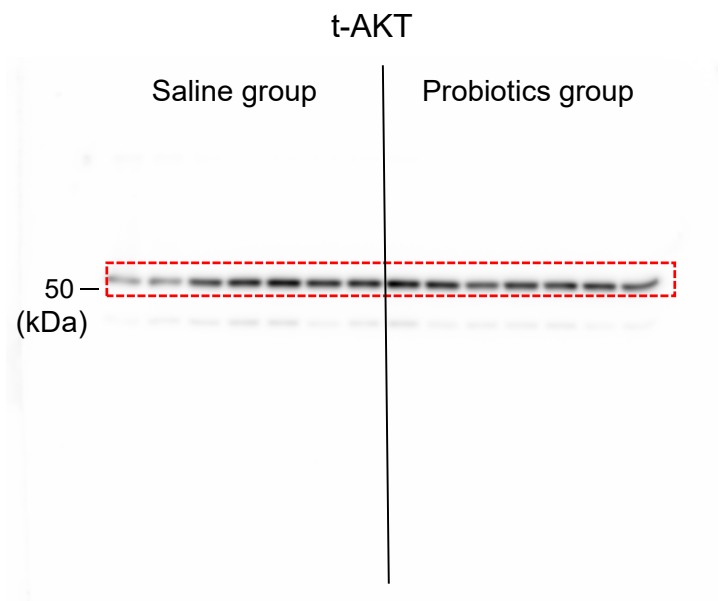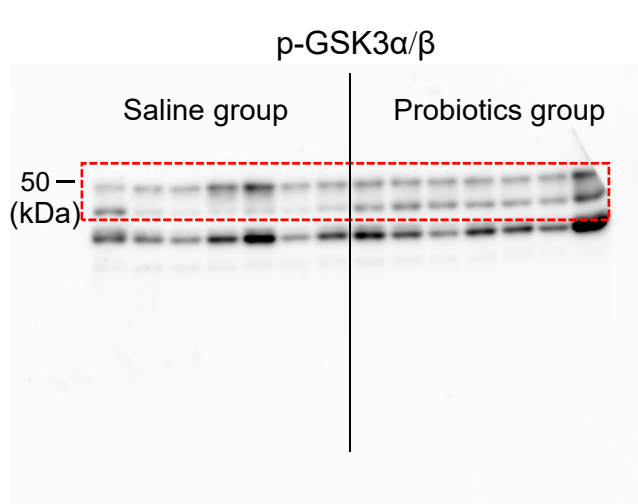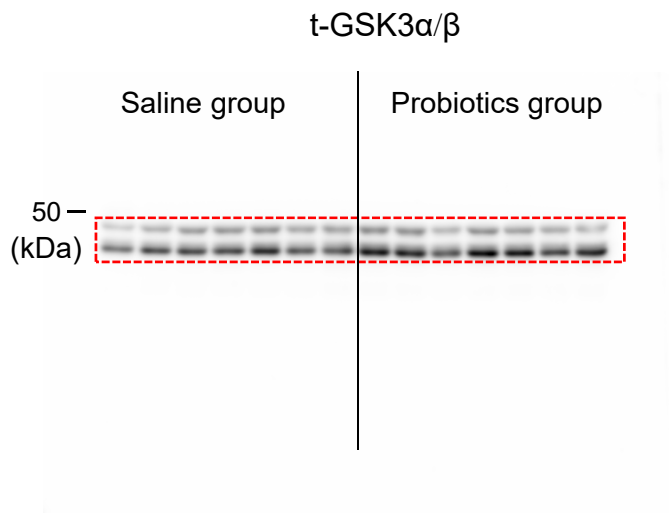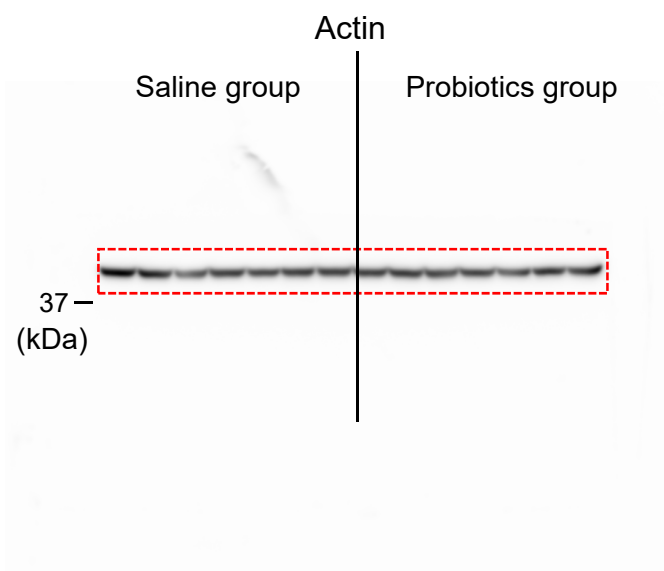

 = main figure

Figure 4 A



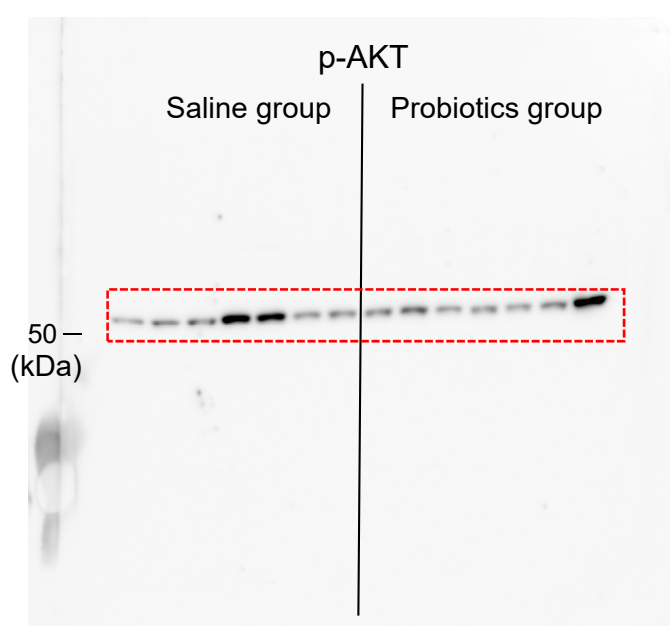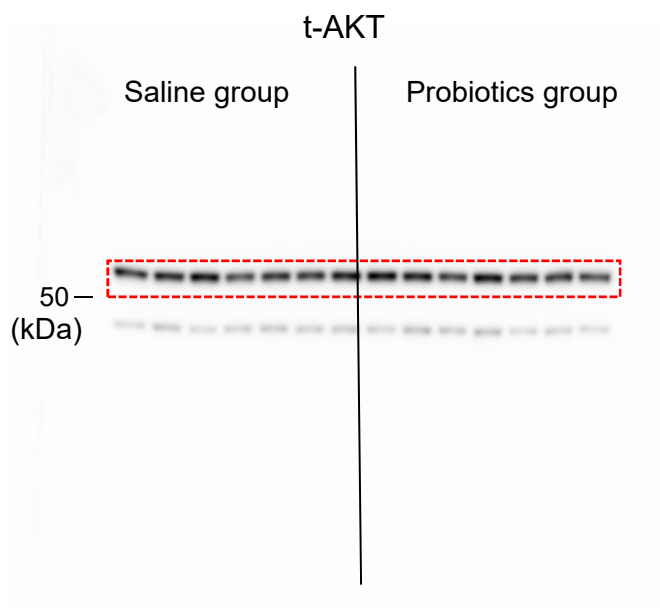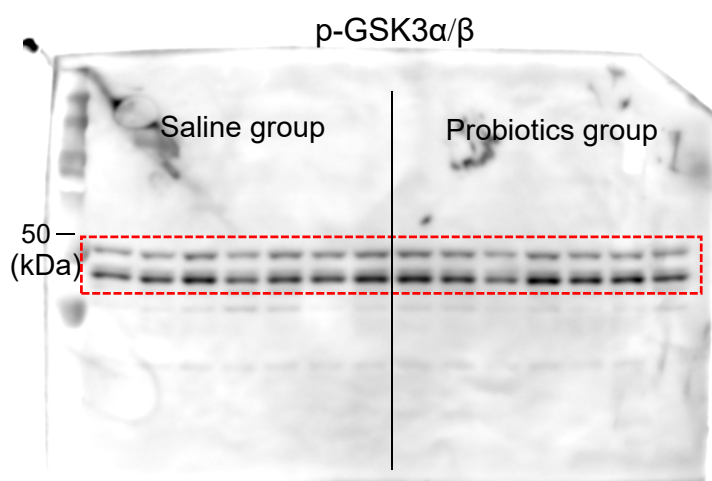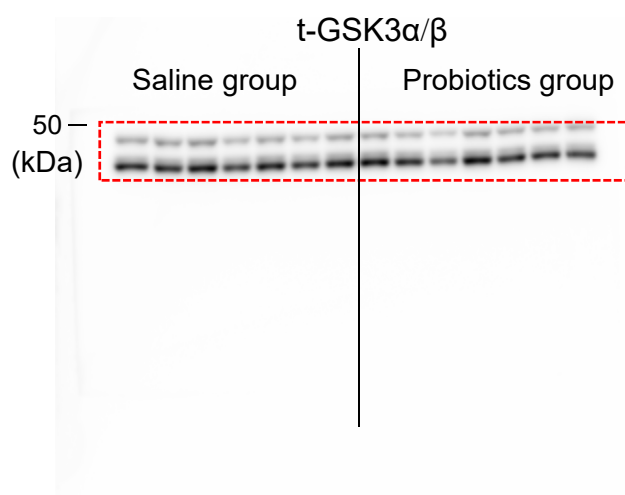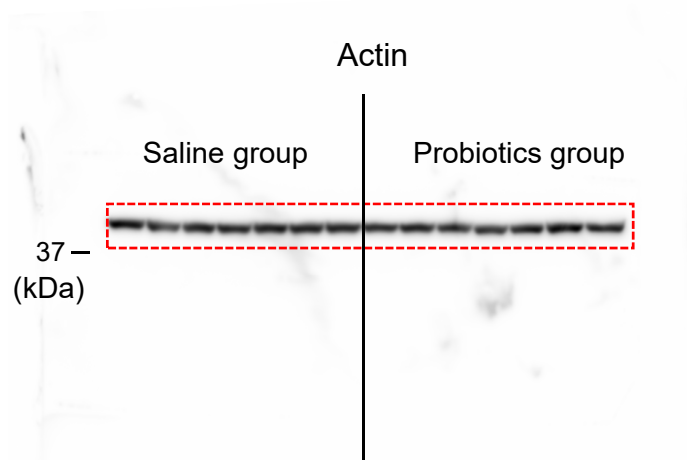

 = main figure

Figure 4 B

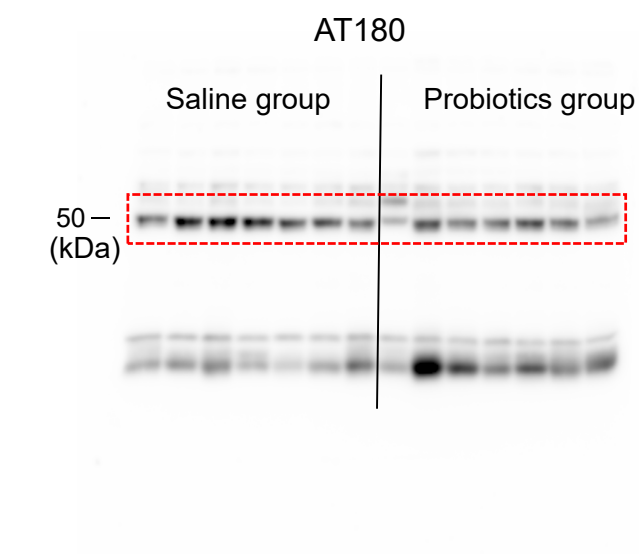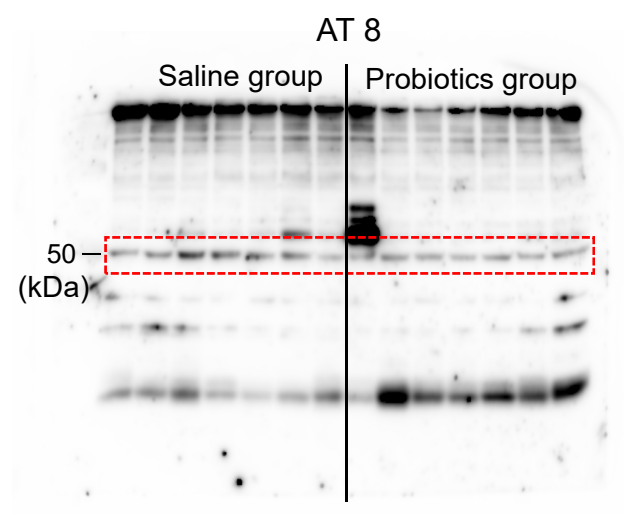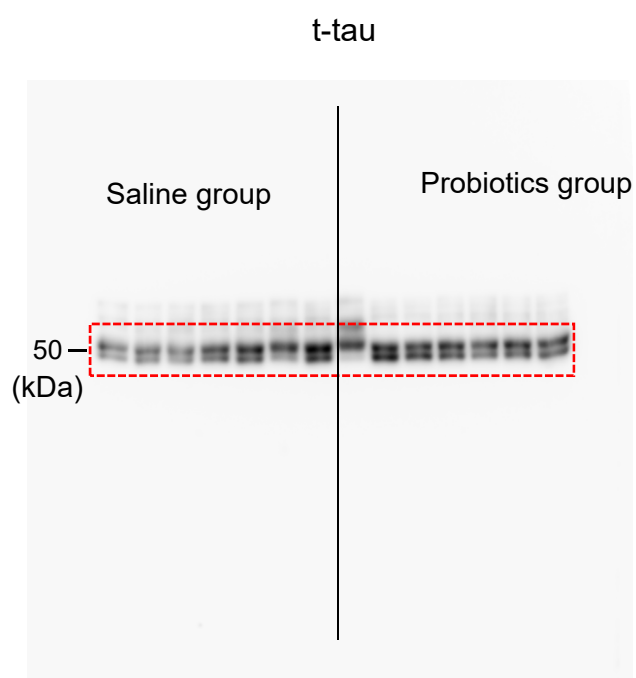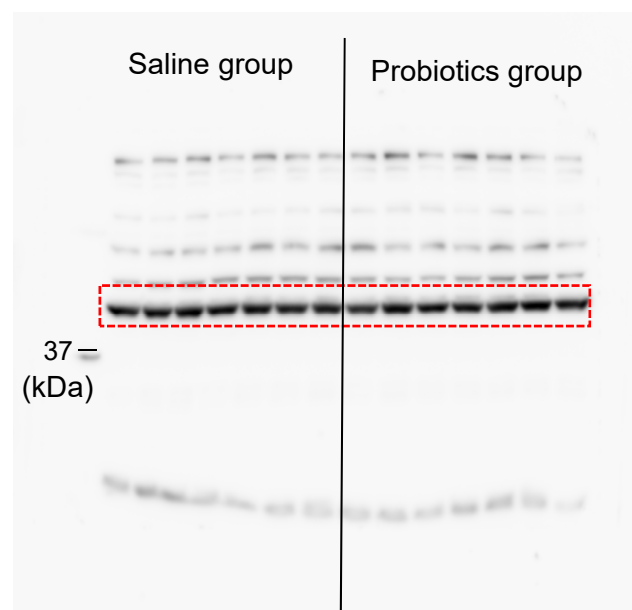

 = main figure

Figure 5 A

AT180

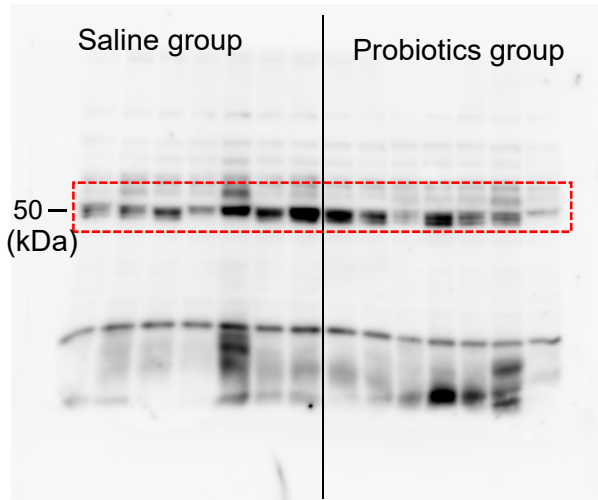

AT8

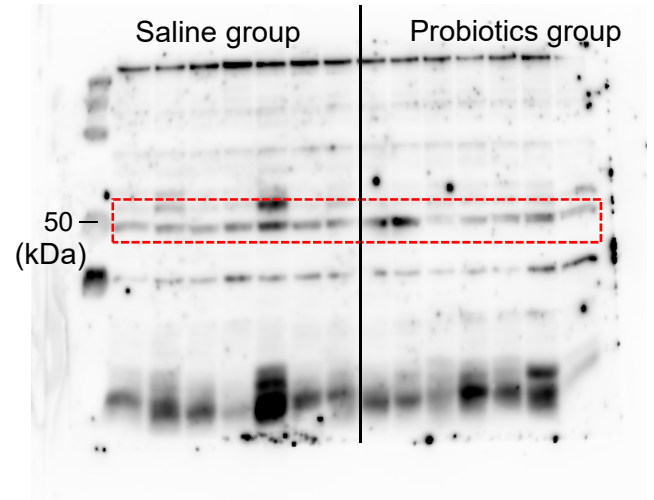

t-tau

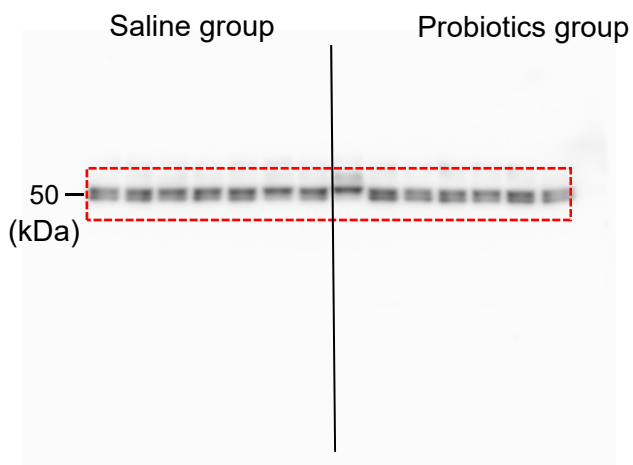

Actin

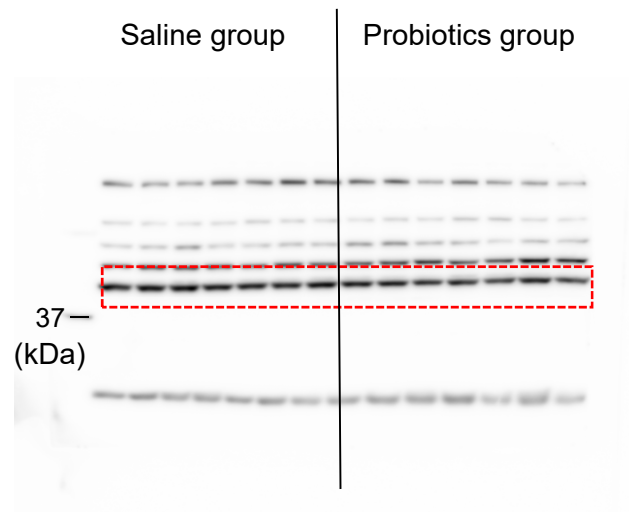

 = main figure

Figure 5 B

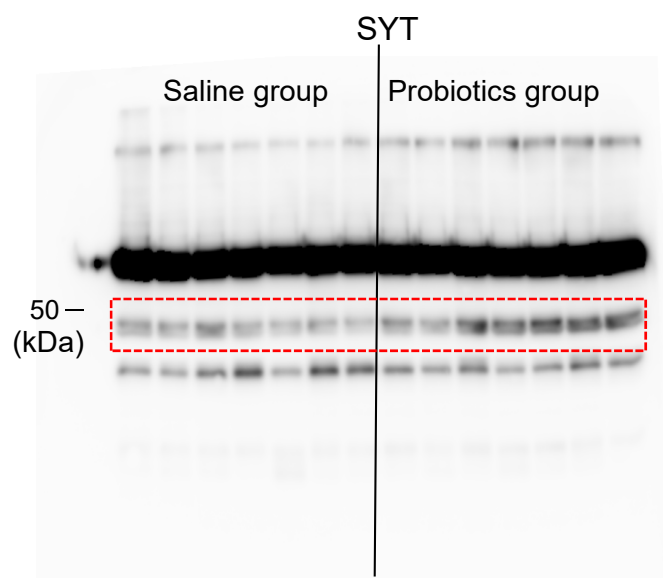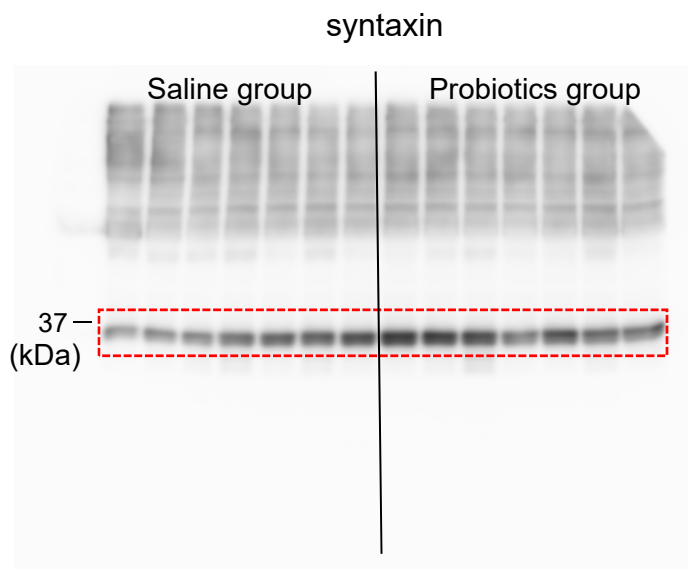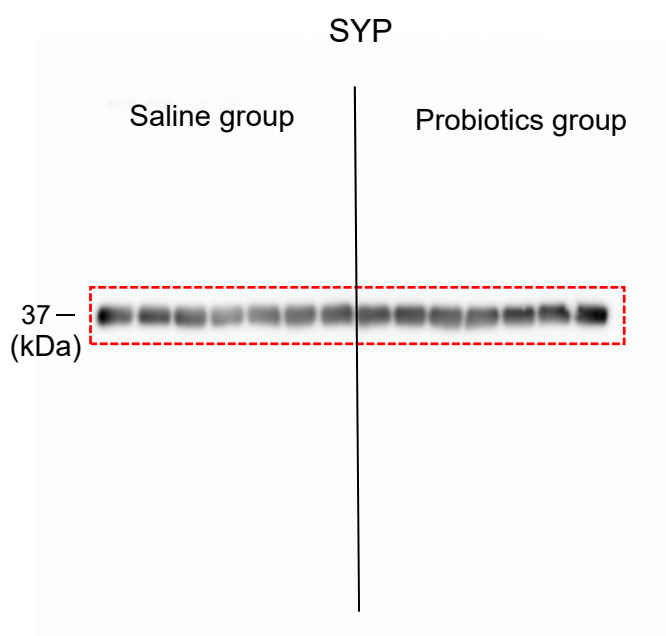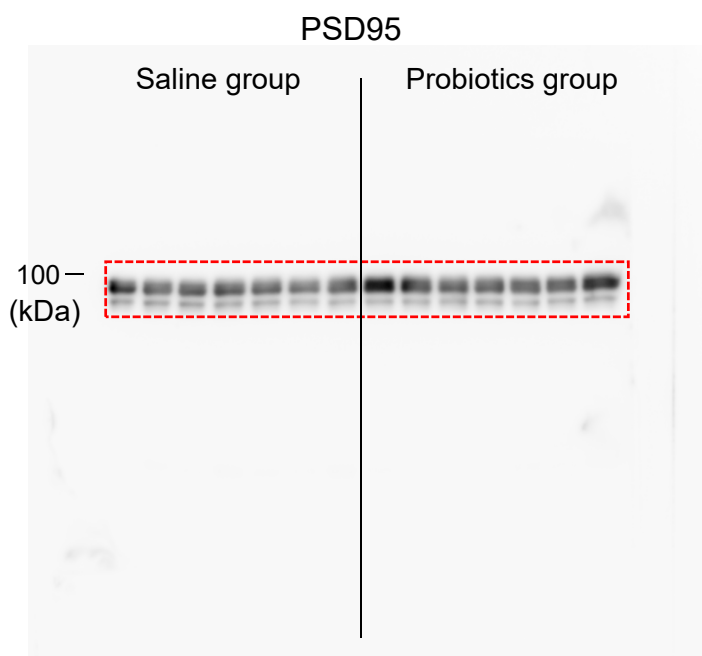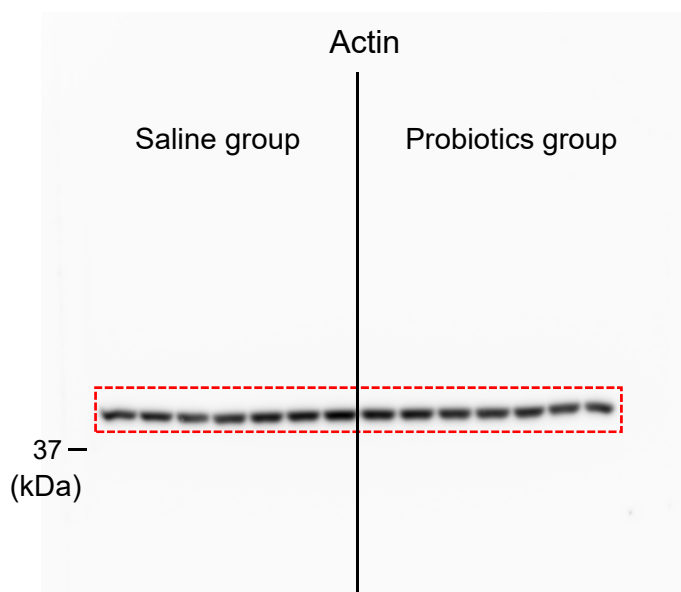

= main figure

Figure 6 A

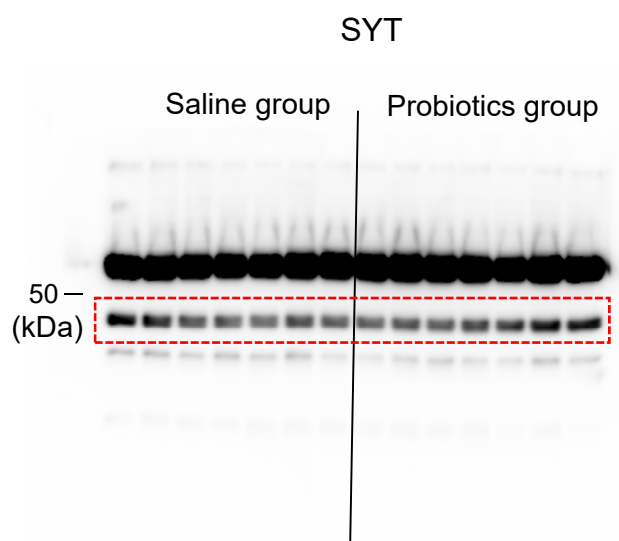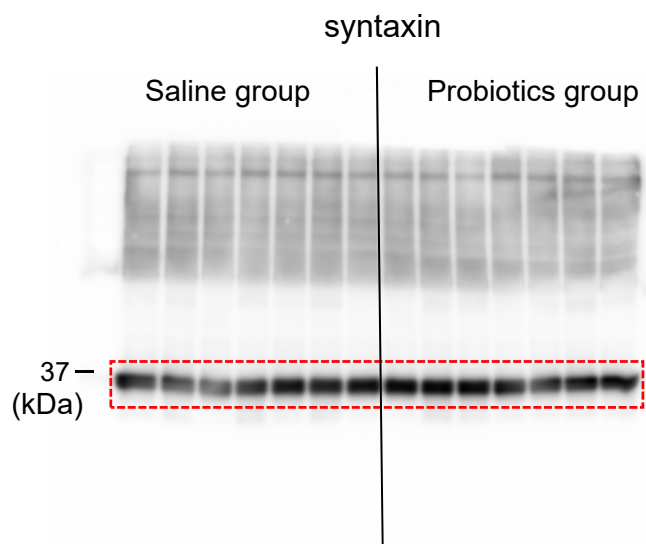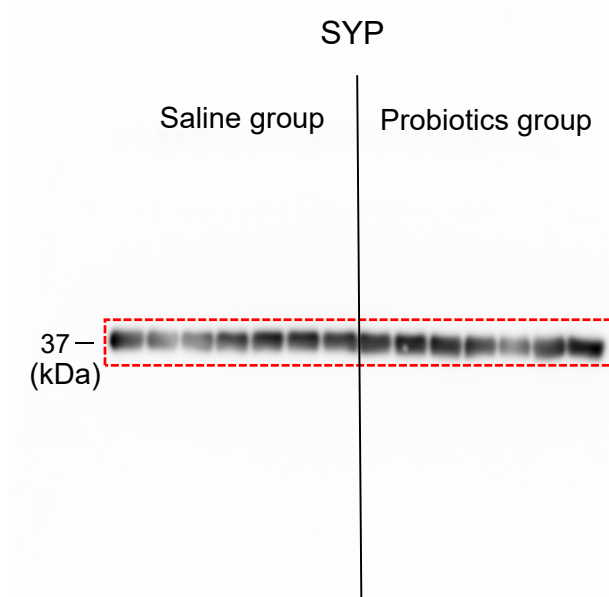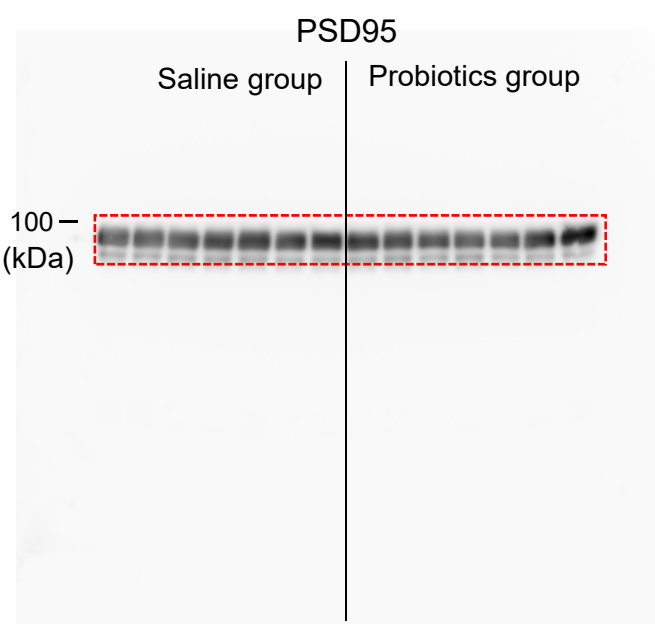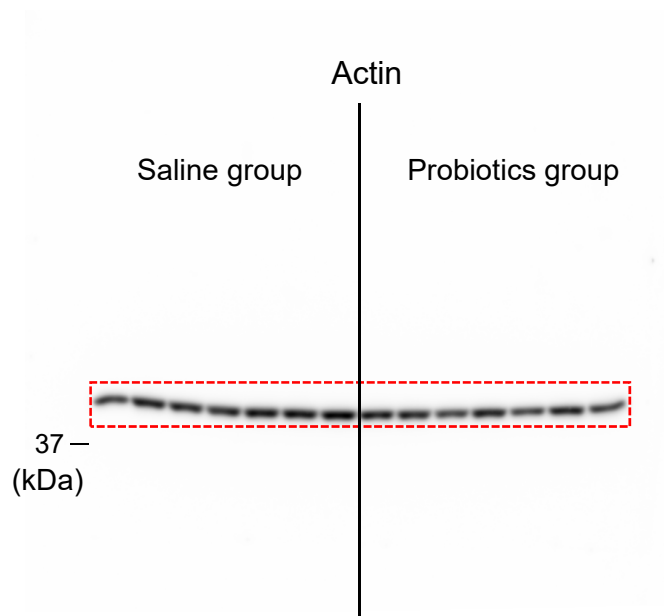

= main figure

Figure 6 B

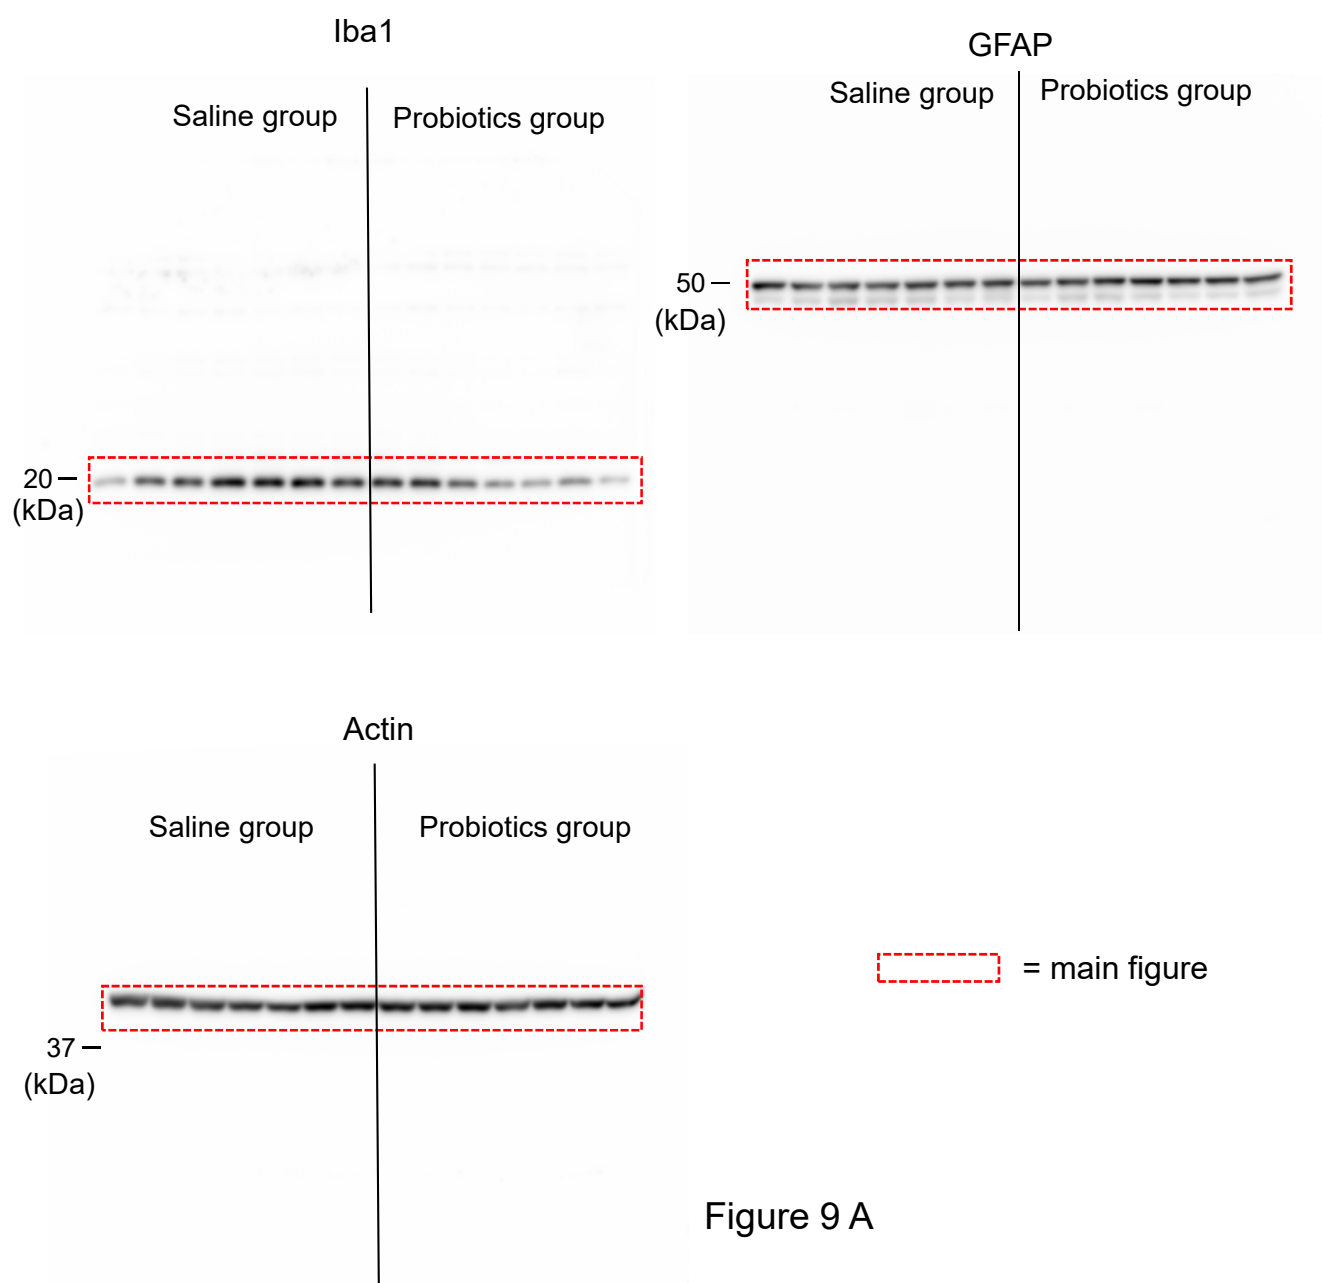

Figure 9 A

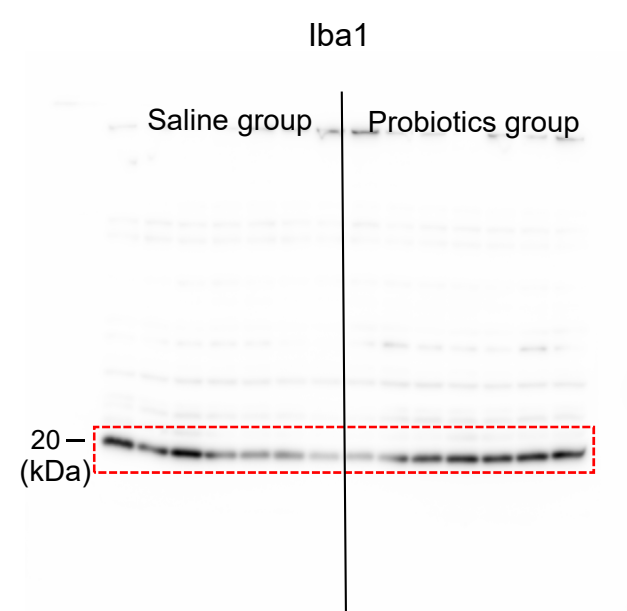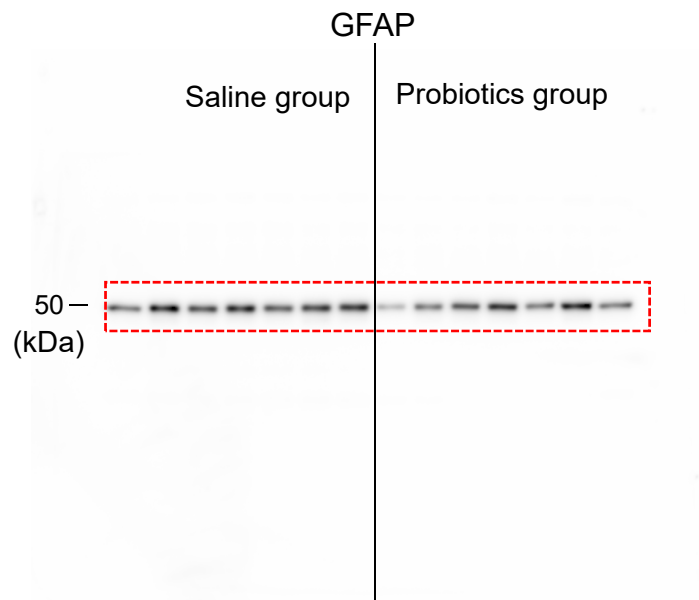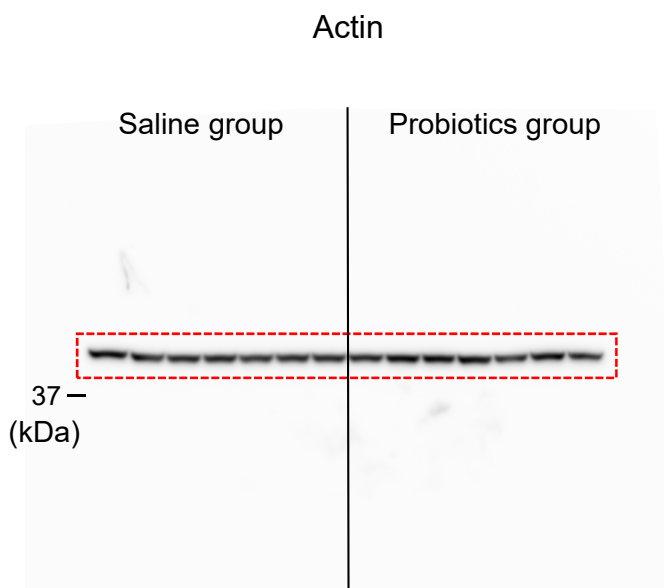

  = main figure

Figure 9 B

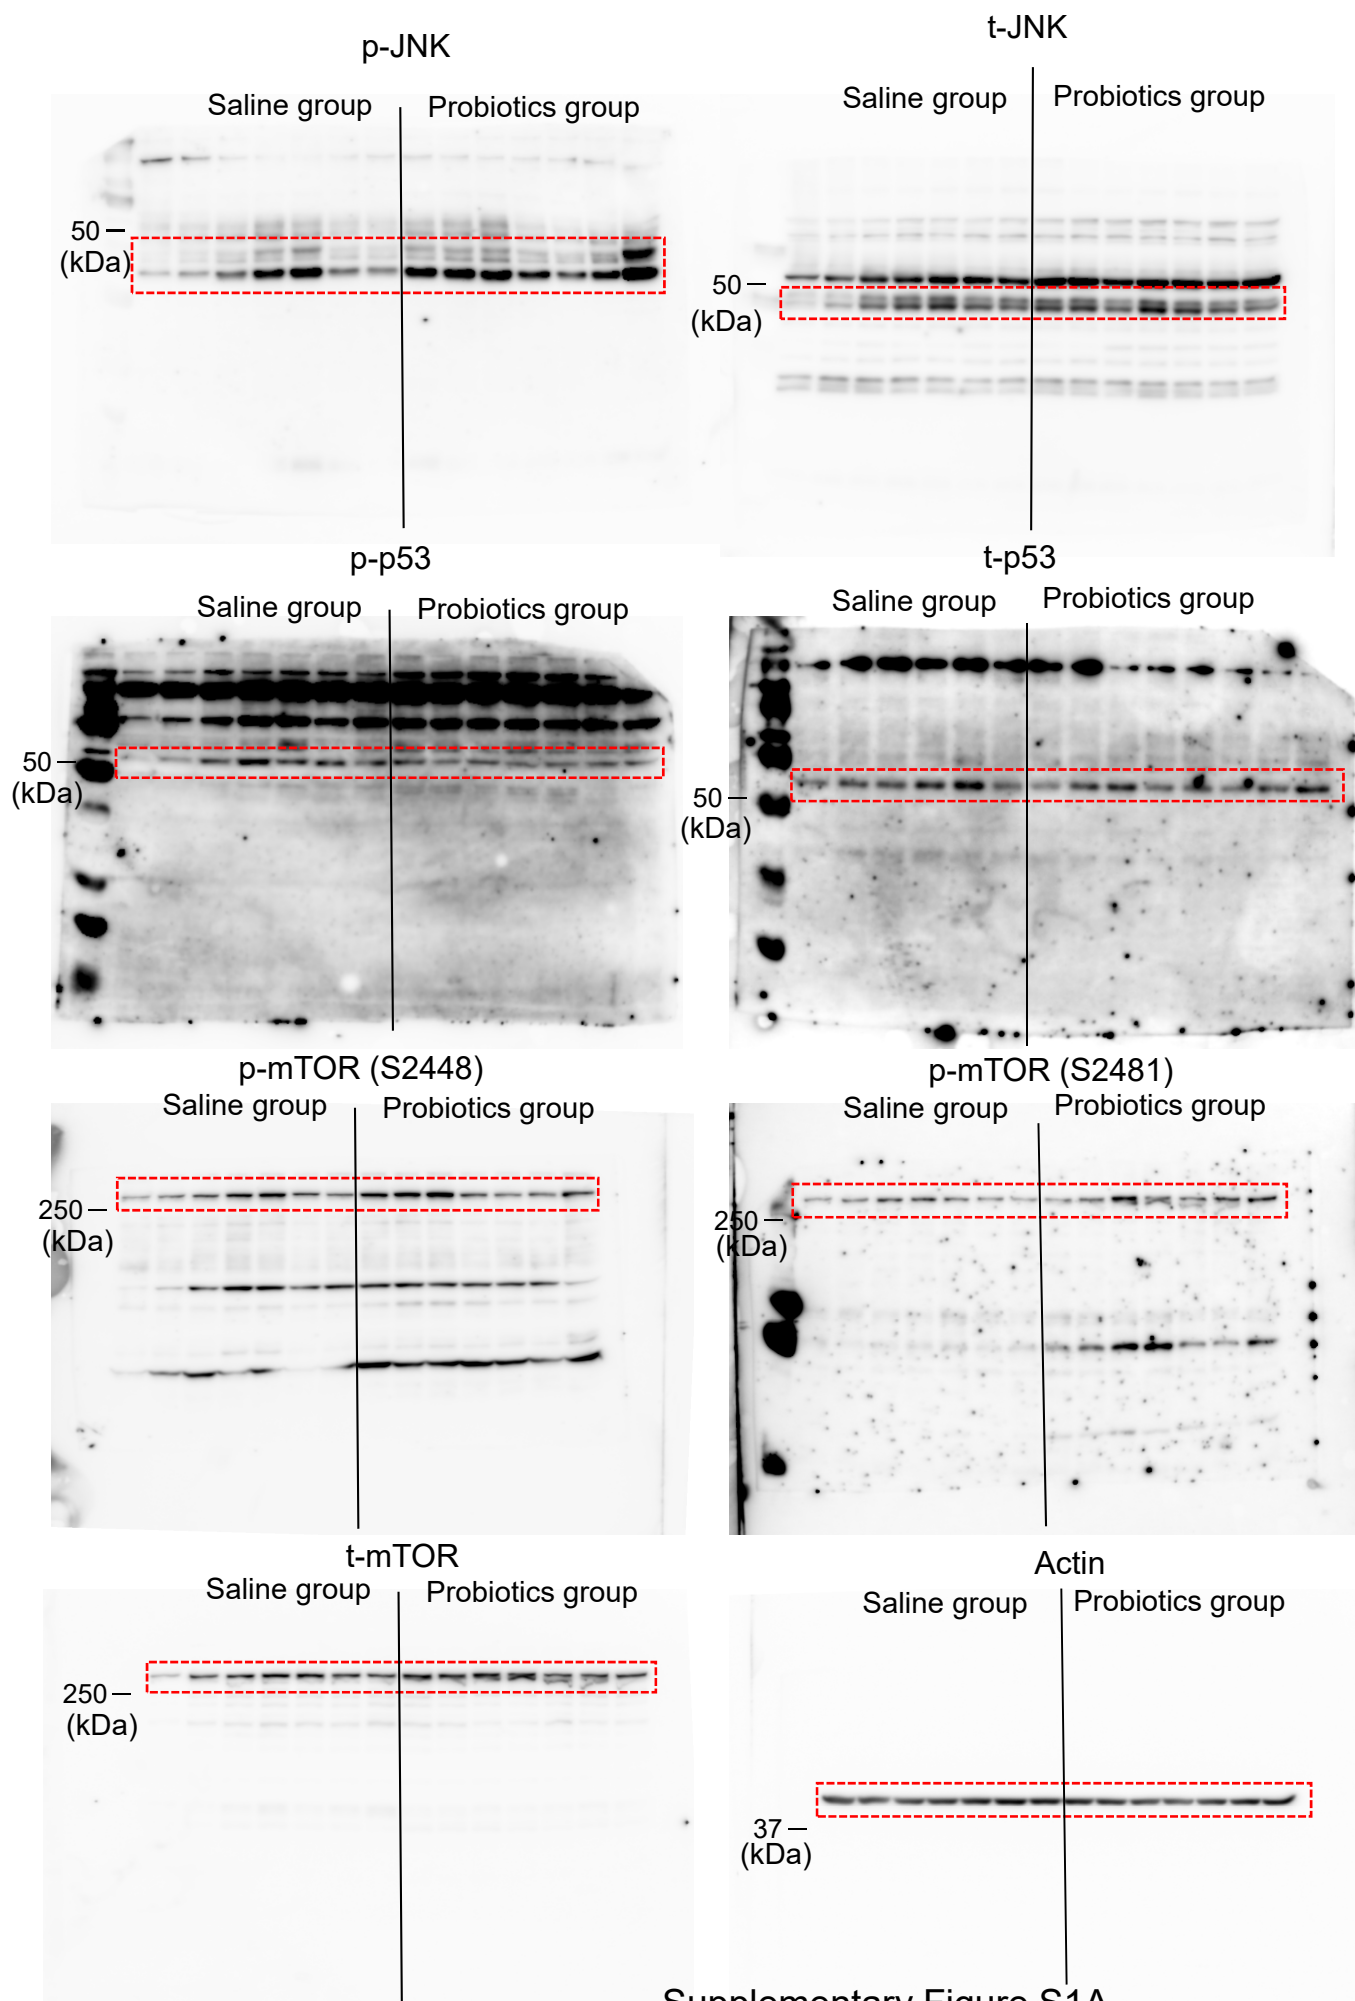

Supplementary Figure S1A



p-JNK

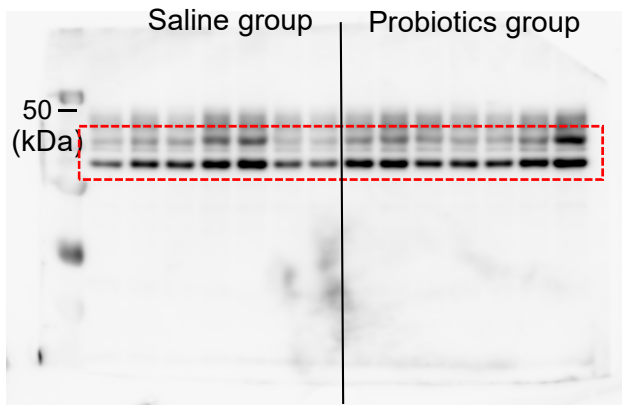

t-JNK

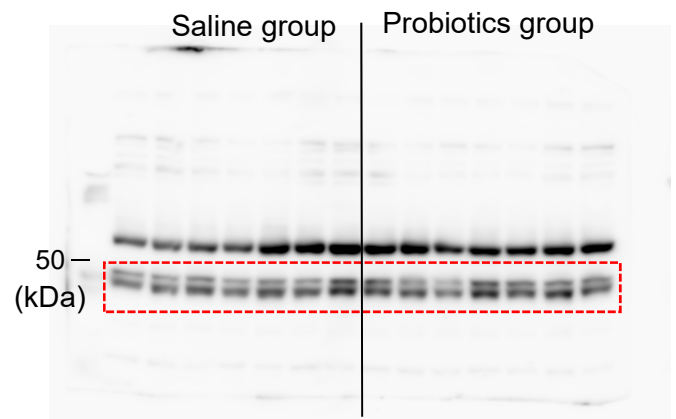

p-p53

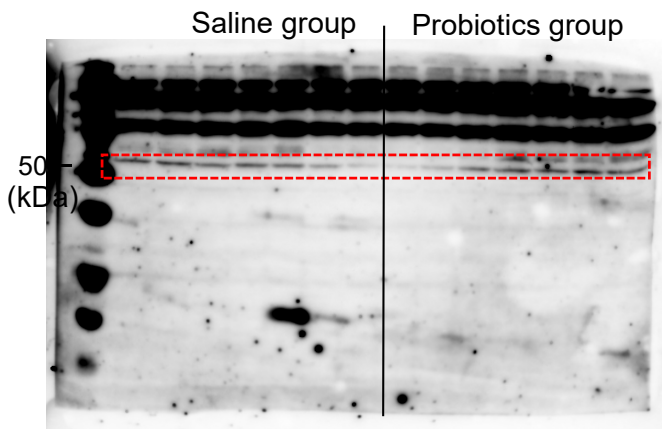

t-p53

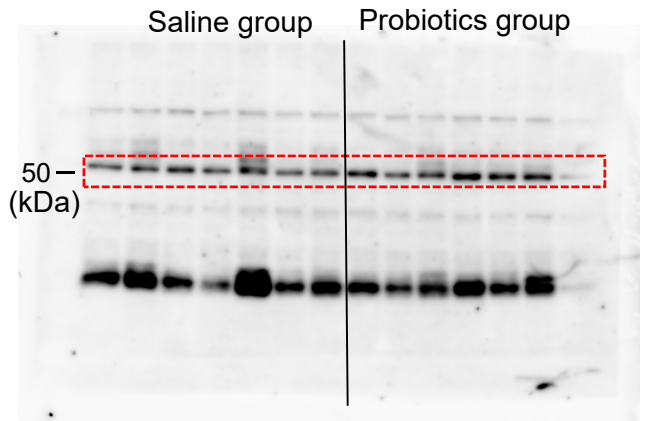

p-mTOR (S2448)

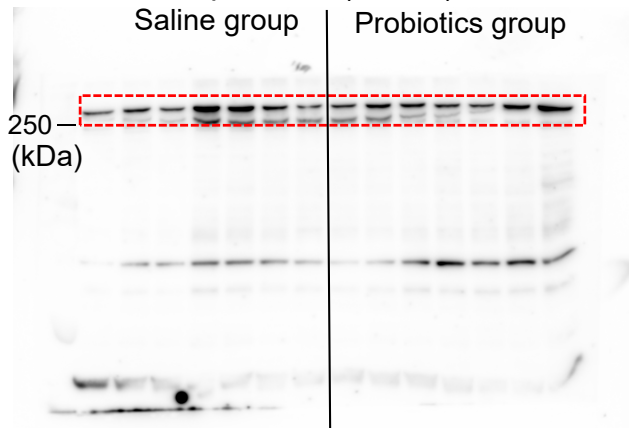

p-mTOR (S2481)

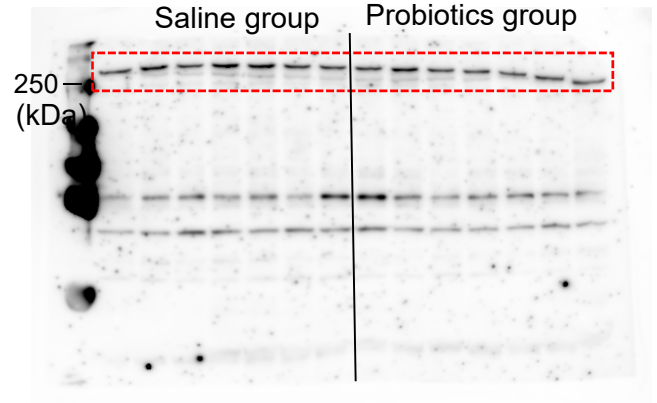

t-mTOR

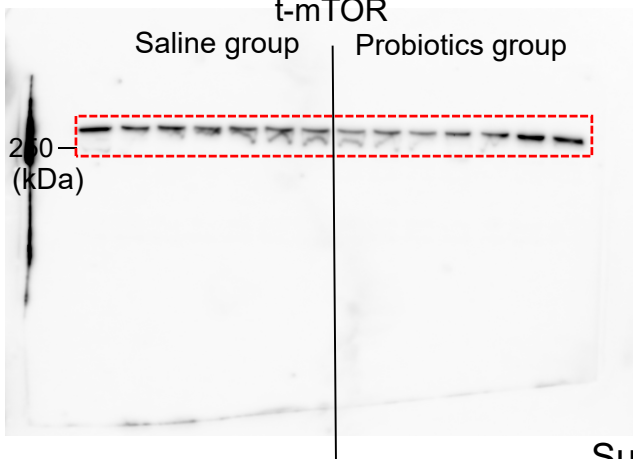

Actin

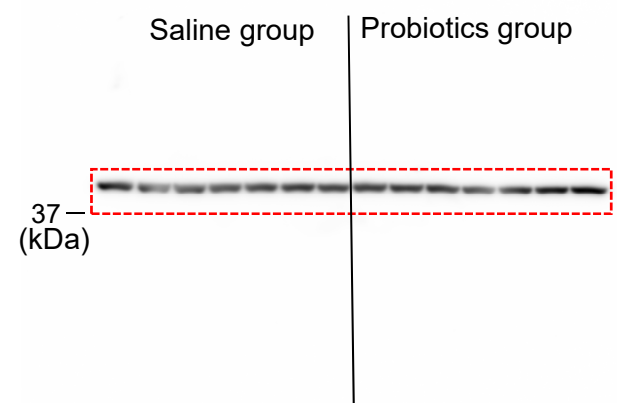

Supplementary Figure S1B
